# Supplementary material for: Microwave Absorption of α-Fe2O3@diatomite Composites
Source: MDPI journal article supplement (doi:10.3390/ijms23169362), 2022-08-19
Supplement: s1 [file s1]

# Microwave Absorption of $\alpha$ -Fe<sub>2</sub>O<sub>3</sub>@diatomite Composites

Chenzhi Zhang <sup>a</sup>, Dashuang Wang <sup>a</sup>, Lichao Dong <sup>b</sup>, Kailin Li <sup>a</sup>, Yifan Zhang <sup>a</sup>, Pingan Yang <sup>c</sup>, Shuang Yi <sup>a</sup>, Xingjian Dai <sup>a</sup>, Changqing Yin <sup>a</sup>, Zhilan Du <sup>a</sup>, Xinfang Zhang <sup>a</sup>,  
Quan Zhou <sup>a</sup>, Zhiyu Yi <sup>a</sup>, Jinsong Rao <sup>a\*</sup>, Yuxin Zhang <sup>a\*</sup>

<sup>a</sup> College of Material Science and Engineering, Chongqing University, Chongqing 400044, China;  
<sup>b</sup> Aerospace Institute of Advanced Materials & Processing Technology, Beijing 100074, China;  
<sup>c</sup> School of Automation, Chongqing University of Posts and Telecommunications, Chongqing 400065, China;

\*Corresponding author.

E-mail: rjs@cqu.edu.cn; zhangyuxin@cqu.edu.cn

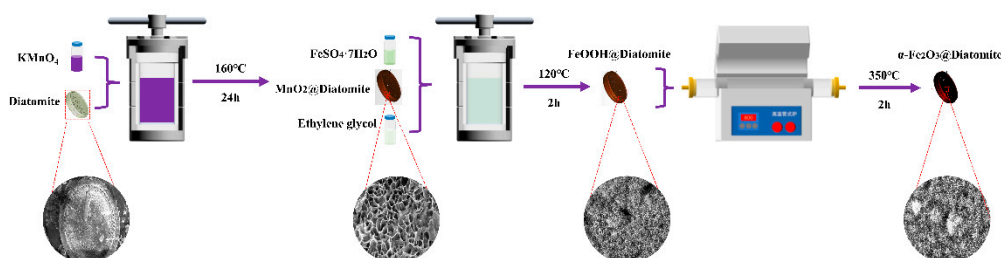

Figure. S1. Preparation flow chart of  $\alpha$ -Fe<sub>2</sub>O<sub>3</sub>@D

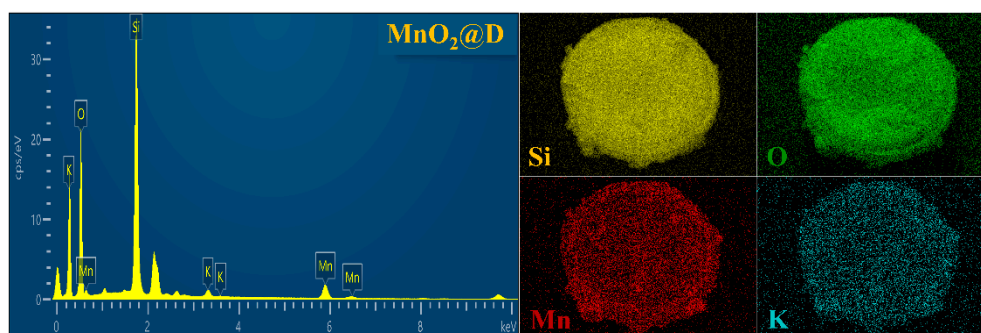

Figure. S2. The EDS images of MnO<sub>2</sub>@D

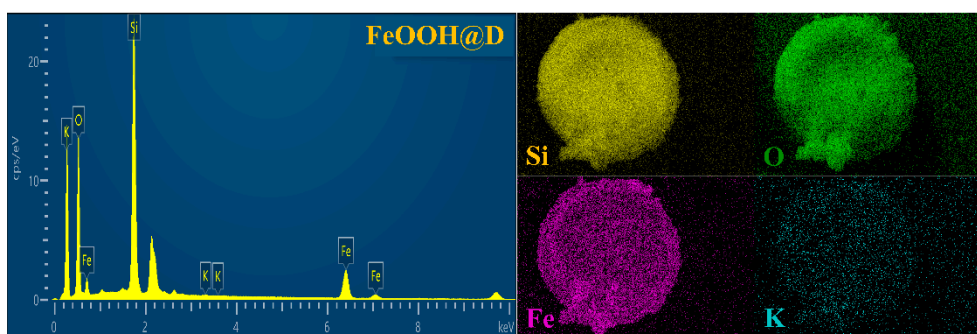

Figure. S3. The EDS images of FeOOH@D

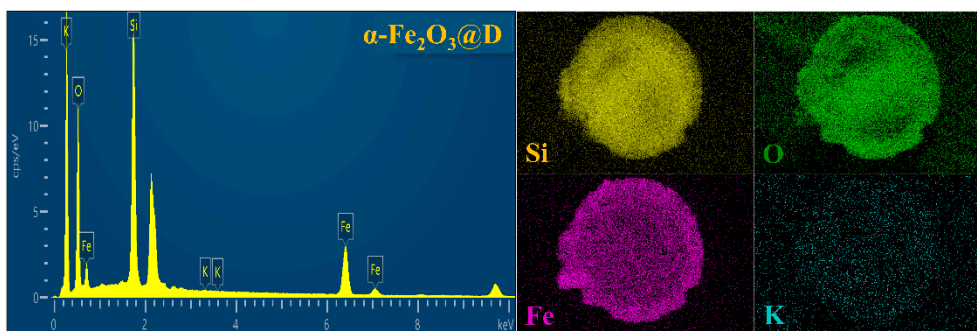

Figure. S4. The EDS images of  $\alpha$ -Fe<sub>2</sub>O<sub>3</sub>@D

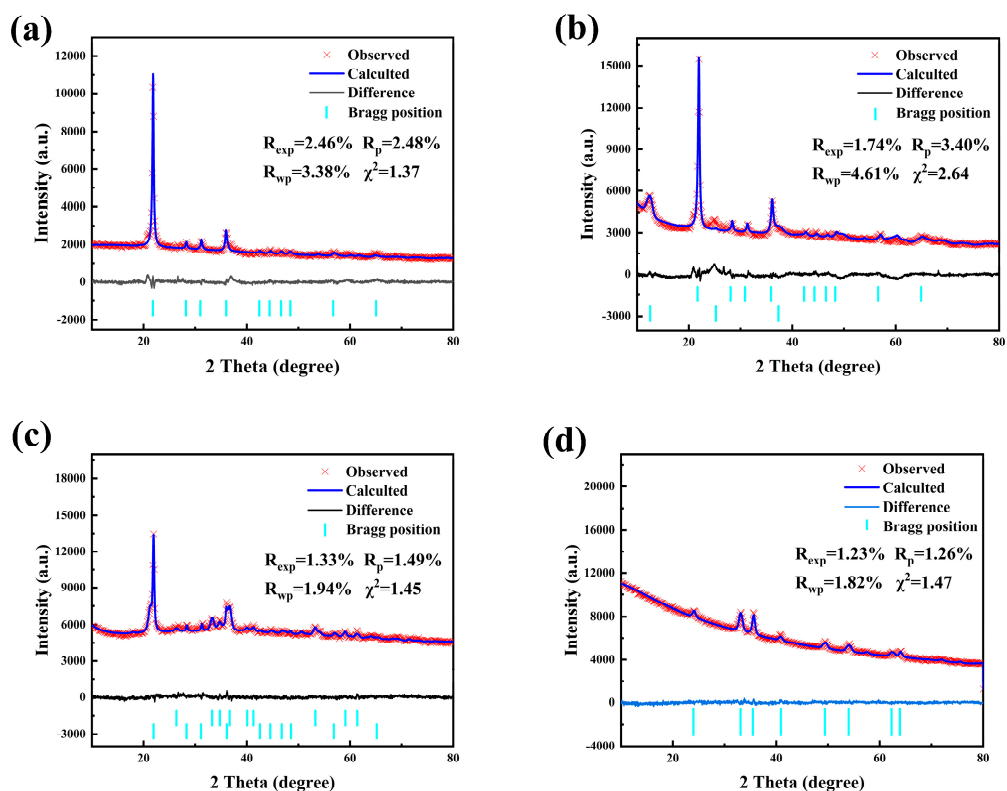

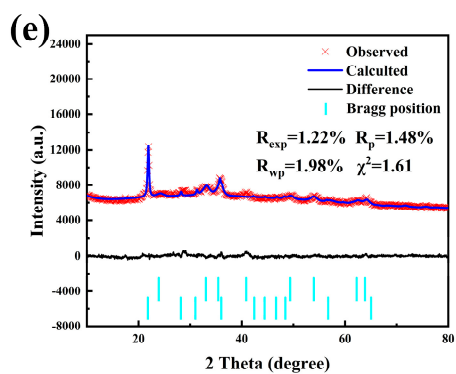

Figure. S5. The detailed Rietveld refinement images of De(a), MnO<sub>2</sub>@D(b), FeOOH@D(c),  $\alpha$ -Fe<sub>2</sub>O<sub>3</sub>(d),  $\alpha$ -Fe<sub>2</sub>O<sub>3</sub>@D(e).

Table. S1. Cell parameters are shown in the following table.

| Sample                            | a [Å] | b [Å] | c [Å] | $\alpha$ [°] | $\beta$ [°] | $\gamma$ [°] | Volume [Å <sup>3</sup> ] | $R_{\text{exp}}$ | $R_p$ | $R_{\text{wp}}$ | $\chi^2$ |
|-----------------------------------|-------|-------|-------|--------------|-------------|--------------|--------------------------|------------------|-------|-----------------|----------|
| SiO <sub>2</sub>                  | 4.98  | 4.98  | 6.99  | 90           | 90          | 90           | 173.99                   | 2.46%            | 2.48% | 3.38%           | 1.37     |
| MnO <sub>2</sub> @D               | 9.81  | 9.81  | 2.84  | 90           | 90          | 90           | 274.26                   | 1.74%            | 3.40% | 4.61%           | 2.64     |
| FeOOH@D                           | 9.95  | 3.02  | 4.61  | 90           | 90          | 90           | 139.04                   | 1.33%            | 1.49% | 1.94%           | 1.45     |
| Fe <sub>2</sub> O <sub>3</sub>    | 8.72  | 5.03  | 5.39  | 90           | 121.7       | 90           | 201.38                   | 1.23%            | 1.26% | 1.82%           | 1.47     |
| Fe <sub>2</sub> O <sub>3</sub> @D | 5.03  | 5.03  | 13.83 | 90           | 90          | 120          | 303.65                   | 1.22%            | 1.48% | 1.98%           | 1.61     |
